1

2 **Drift barriers for the proofreading of genes expressed at different levels**

3 Xiong K<sup>\*</sup>, McEntee JP<sup>†</sup>, Porfirio DJ<sup>‡</sup>, Masel J<sup>†</sup>

4

5 <sup>\*</sup> Department of Molecular & Cellular Biology, <sup>†</sup> Department of Ecology & Evolutionary Biology,

6 <sup>‡</sup> Department of Computer Science, University of Arizona, Tucson AZ 85721

7 Corresponding author: Joanna Maseł 1041 E Lowell St, Tucson AZ 85721 USA

8 masel@email.arizona.edu Ph. +1 520-626-9888

9 Running title: Drift barriers for proofreading

10 Keywords: cryptic genetic variation, stop codon readthrough, robustness, evolvability,

11 transcriptional errors

12  
13  
14  
15  
16  
17  
18  
19  
20  
21  
22  
23  
24  
25  
26  
27  
28  
29

## ABSTRACT

Gene expression is imperfect, sometimes leading to toxic products. Solutions take two forms: globally reducing error rates, or ensuring that the consequences of erroneous expression are relatively harmless. The latter is optimal, but because it must evolve independently at so many loci, it is subject to a stringent “drift barrier” – a limit to how weak the effects of a deleterious mutation  $s$  can be, while still being effectively purged by selection, expressed in terms of the population size  $N$  of an idealized population such that purging requires  $s < -1/N$ . In previous work, only large populations evolved the optimal local solution, small populations instead evolved globally low error rates, and intermediate populations were bistable, with either solution possible. Here we take into consideration the fact that the effectiveness of purging varies among loci, because of variation in gene expression level and variation in the intrinsic vulnerabilities of different gene products to error. The previously found dichotomy between the two kinds of solution breaks down, replaced by a gradual transition as a function of population size. In the extreme case of a small enough population, selection fails to maintain even the global solution against deleterious mutations, explaining recent experimental findings of similarly high transcriptional error rates in large- $N_e$  and small- $N_e$  species. As expected from previous work, the evolvability of a population tracks the number of loci at which erroneous expression is tolerated.

30

## INTRODUCTION

31 In classical population genetic models of idealized populations, the probability of fixation of a  
32 new mutant depends sharply on the product of the selection coefficient  $s$  and the population  
33 size  $N$ . As  $s$  falls below  $-1/N$ , fixation probabilities drop exponentially, corresponding to efficient  
34 selective purging of deleterious mutations. For  $s > -1/N$ , random genetic drift makes the fate of  
35 new mutants less certain. This nonlinear dependence of fixation probability on  $sN$  has given rise  
36 to the “drift barrier” hypothesis (Lynch 2007), which holds that populations are characterized  
37 by a threshold or “barrier” value of the selection coefficient  $s$ , corresponding to the tipping  
38 point at which the removal of deleterious mutations switches between effective and  
39 ineffective. In the idealized populations described by Wright-Fisher or Moran models, the drift  
40 barrier is positioned at  $s = \sim -1/N$ . Drift barriers also exist, albeit sometimes with less abrupt  
41 threshold behavior, in more complex models of evolution in which some assumptions of an  
42 idealized population are relaxed (Good and Desai 2014).

43

44 The drift barrier theory argues that variation among species in their characteristic threshold  
45 values for  $s$ , thresholds that are equal by definition to the inverse of the selection effective  
46 population size  $N_e$ , can explain why different species have different characteristics, e.g.  
47 streamlined versus bloated genomes (Lynch 2007). The simplest interpretation of the drift  
48 barrier would seem to imply that large- $N_e$  species show higher levels of fidelity over all  
49 biological processes, e.g. DNA replication, transcription, and translation, than small- $N_e$  species,  
50 because molecular defects that reduce fidelity are less effectively purged in the latter (Lynch  
51 2010; Traverse and Ochman 2016).

52

53 However, as the fitness burden accumulates from the slightly deleterious mutations that a  
54 small- $N_e$  species cannot purge, some forms of fidelity may evolve as a second line of defense.  
55 The ideal solution is to purge deleterious mutations; when this first line of defense fails, the  
56 second line of defense is to ameliorate the phenotypic consequences of deleterious mutations  
57 (Frank 2007; Rajon and Masel 2011; Warnecke and Hurst 2011; Lynch 2012; Wu and Hurst  
58 2015). In some circumstances, as described further below, high fidelity can act as such an  
59 amelioration strategy (Rajon and Masel 2011). The existence of two distinct lines of defense  
60 complicates the naive drift barrier logic that large- $N_e$  species should generally exhibit higher  
61 fidelity in all molecular processes. The superior performance of large- $N_e$  species in the primary  
62 line of defense may lead to low fidelity in the secondary line of defense. This creates a  
63 seemingly counter-intuitive pattern in the secondary line of defense, in which small- $N_e$  species  
64 can evolve more faithful processes than large- $N_e$  species.

65

66 We are not aware of any definitive observations of this counter-intuitive phenomenon, but  
67 large- $N_e$  *E. coli* have similarly high (although not, as predicted, even higher) transcriptional error  
68 rates as the small- $N_e$  endosymbiont *Buchnera* (McCandlish and Plotkin 2016; Traverse and  
69 Ochman 2016). Unlike *Buchnera*, *E. coli* shows signs of having evolved a first line of defense in  
70 the form of a decreased frequency with which observed transcriptional errors translate into  
71 non-synonymous changes, relative to randomly sampled transcriptional errors (Traverse and  
72 Ochman 2016).

73

74 The existence of two substantively different lines of defense was first proposed by Krakauer  
75 and Plotkin (2002), who contrasted the “redundancy” of robustness to the consequences of  
76 mutational errors with the “antiredundancy” of hypersensitivity to mutations. By positing that  
77 redundancy had a cost, they showed that the superior cost-free solution of antiredundancy was  
78 available only with large  $N_e$ , giving small- $N_e$  species higher levels of “redundancy”.

79  
80 A related argument was made by Rajon and Masel (2011) in the context of mitigating the harms  
81 threatened by errors in molecular processes such as translation. Rajon and Masel (2011)  
82 distinguished between “local” solutions, where a separate solution is required at each locus,  
83 and “global” solutions that can deal with problems at many loci simultaneously. The evolution  
84 of extensive proofreading mechanisms was deemed a global solution because it can  
85 simultaneously prevent gene expression errors at many loci. Global fidelity via proofreading  
86 should come, however, with a cost in time or energy. The alternative, local solution is to have a  
87 benign rather than a strongly deleterious “cryptic genetic sequence” at each locus at which  
88 expression errors might occur, making the consequence of an error at that locus relatively  
89 harmless. In contrast to the global solution, these local solutions bear no direct fitness cost, but  
90 because selection at any one locus is weak, mutations at any one locus pass more easily  
91 through the drift barrier, making them more difficult to maintain than global solutions.

92  
93 Both the proofreading of Rajon and Masel (2011) and the “redundancy” of Krakauer and Plotkin  
94 (2002) to the consequences of mutations are global across loci, and also costly. Meantime, both  
95 the “local” solutions of Rajon and Masel (2011) and the “antiredundancy” of Krakauer and

96 Plotkin (2002) carry no true fitness cost but instead require a large- $N_e$  drift barrier and/or face a  
97 “cost of selection” (Haldane 1957) as limits to their adaptation. A mutation disrupting a solution  
98 specific to a single locus requires a large value of  $N_e$  for its purging, whereas a mutation  
99 disrupting a global proofreading solution will have large fitness consequences and so be easier  
100 to purge. The higher-fitness solution is the local one, but it is evolutionarily achievable only with  
101 large  $N_e$ . With small  $N_e$ , we instead expect global solutions such as costly high-fidelity  
102 proofreading.

103  
104 Selection to purge deleterious cryptic sequences in favor of benign cryptic genetic sequences,  
105 i.e. achieving the local solution, may be difficult and hence restricted to high- $N_e$  populations,  
106 but there are reasons to believe that it is not impossible. For example, when the error in  
107 question is reading through a stop codon, the local cryptic genetic sequence is the 3'UTR, which  
108 will now be read by the ribosome. One option for a more benign form of this cryptic sequence  
109 is the presence of a “backup” stop codon that provides the ribosome with a second and  
110 relatively early chance to terminate translation. Such backup stops are common at the first  
111 position past the stop in prokaryotes (Nichols 1970). In *Saccharomyces cerevisiae*, there is also  
112 an abundance of stop codons at the third codon position past the stop (Williams *et al.* 2004).  
113 Moreover, conservation at this position depends strongly on whether or not the codon is a  
114 stop, and the overrepresentation of stops at this position is greater in more highly expressed  
115 genes (Liang *et al.* 2005). In some ciliates, where the genetic code has been reassigned so that  
116 UAA and UAG correspond to glutamine, this overrepresentation is much more pronounced  
117 (Adachi and Cavalcanti 2009). As with the consequences of erroneous readthrough, selective

118 pressure on erroneous amino acid misincorporation and/or misfolding (Drummond and Wilke  
119 2008), and on erroneous protein-protein interactions (Brettner and Masel 2012) are also strong  
120 enough to shape protein expression and interaction patterns.

121  
122 Rajon and Masel (2011) also found that for intermediate values of  $N_e$  that correspond strikingly  
123 well to many multicellular species of interest, the evolutionary dynamics of the system were  
124 bistable, with either the global or the local solution possible. This is a natural consequence of a  
125 positive feedback loop; in the presence of a global proofreading solution, specialized solutions  
126 at particular loci are unnecessary and mutations destroying them pass through the drift barrier  
127 (we use the expression “pass through the drift barrier” to mean that  $0 > s > -1/N$ ), with their  
128 subsequent absence increasing the demand for proofreading. Similarly, when specialized  
129 solutions predominate, the advantage to proofreading is lessened, and resulting higher error  
130 rates further increase selection for many locally specialized solutions. If true, this bistability  
131 suggests that historical contingency, rather than current values of  $N_e$ , determine which  
132 processes are error-prone vs. high-fidelity.

133  
134 In the current work, we note that the model of Rajon and Masel (2011) contained an unrealistic  
135 symmetry, namely that the fitness consequence of a molecular error at one locus was exactly  
136 equal to that at any other loci. Here we find that with reasonable amounts of variation among  
137 loci (e.g. in their expression level or the per-molecule damage from their misfolded form), the  
138 bistability disappears. Intermediate solutions evolve instead, where cryptic deleterious  
139 sequences are purged only in more highly expressed genes, and proofreading evolves to



140 intermediate levels. The findings of Traverse and Ochman (2016) can be explained by our model  
141 if the drift barrier in *Buchnera* allows not only deleterious mutations to local cryptic genetic  
142 sequences to pass through, but also increases in the global transcriptional error rate.  
143 Throughout our work, evolvability continues to track the proportion of loci that contain a  
144 benign rather than a deleterious cryptic sequence.

145

146

## METHODS

147 In the following sections, we describe the computational model used to simulate the evolution  
148 of different solutions to errors in gene expression. All simulations were run with Matlab  
149 (R2014a). Scripts of the simulations are available at <https://github.com/MaselLab/Xiong-et-al-Error-rate-evolution-with-variation-in-gene-expression>.

150

### **Fitness**

151  
152 We follow the additive model of Rajon and Masel (2011), as outlined below, and with a few  
153 important modifications to accommodate variation in gene expression levels. The model's  
154 canonical example is the risk that a ribosome reads through a stop codon during translation.  
155 The global mitigation strategy is to increase proofreading of this gene expression subprocess.  
156 Geometric reductions in error rate come at a direct additive cost in the time or energy involved  
157 in the gene expression subprocess, so that the fitness component associated with reducing the  
158 readthrough error rate to  $\rho$  is given by

159

160  
161 
$$w_{proofread\_cost} = \frac{1}{1 - \delta \ln \rho} \tag{1}$$

162

163 The parameter  $\delta$  indicates the relative burden of checking stop codons relative to other  
164 molecular processes. Following Rajon and Masel (2011), we set  $\delta = 10^{-2.5}$ , such that reducing  $\rho$   
165 from  $10^{-2}$  to  $10^{-3}$  corresponds to a 0.7% reduction in fitness.

166

167 When readthrough happens, with frequency  $\rho$ , the consequences for fitness depend on the  
168 nature of the “cryptic sequence” that lies beyond the stop codon in the 3'UTR. A striking finding  
169 from biology is that the consequences of mistakes, mutational or otherwise, have a bimodal  
170 distribution, being either strongly deleterious (often lethal), or relatively benign, but rarely in  
171 between (Fudala and Korona 2009). For example, a strongly deleterious variant of a protein  
172 might misfold in a dangerous manner, while a benign variant might fold correctly, although with  
173 reduced activity. We assume that alternative alleles of cryptic genetic sequences can be  
174 categorized according to a benign/deleterious dichotomy.

175

176 The local mitigation strategy, the alternative to global proofreading, is thus for each cryptic  
177 sequence to evolve away from “deleterious” options and toward “benign” options. The local  
178 strategy of benign cryptic sequences has no direct fitness cost, but it is nevertheless difficult to  
179 evolve at so many loci at once. In contrast, expressing deleterious cryptic sequences has an  
180 appreciable cost. This cost scales both with the base rate of expression of the gene, and the  
181 proportion  $\rho$  of gene products that include the cryptic sequence.

182

183 Let the expression of gene  $i$  be  $E_i$ . We assign the concentration  $E_i$  of protein molecules of type  $i$   
184 by sampling values of  $E_i$  from a  $\log_2$ -normal distribution with standard deviation  $\sigma_E$ . We define  $D$   
185 to be the total frequency of protein expression that would be highly deleterious if expressed in  
186 error:

187

$$188 \quad D = \frac{\sum_{i\_deleterious} E_i}{\sum_i E_i} \quad (2)$$

189

190 where the numerator sums only over loci that are deleterious and the denominator sums over  
191 all loci. This normalization makes the mean value of  $E_i$  irrelevant. We assume the costs of  
192 deleterious readthrough are additive across genes, based on the concept that misfolded  
193 proteins (Thomas *et al.* 1995) may aggregate in a non-specific and harmful manner with other  
194 proteins and/or membranes (Kourie and Henry 2002), or may simply be expensive to dispose of  
195 (Goldberg 2003). After the stop codon is read through, translation will usually end at a backup  
196 stop codon within the 3'UTR. Under the assumption of additivity, single readthrough events will  
197 reduce fitness by  $c\rho D$ , where  $c$  represents the strength of selection against misfolded proteins.  
198 Geiler-Samerotte *et al.* (2011) found that an increase in misfolded proteins of approximately  
199 0.1% of total cellular protein molecules per cell imposed a cost of about 2% to relative growth  
200 rate. This gives an estimate of  $c = 0.02/0.1\% = 20$ .

201

202 Readthrough involving benign cryptic sequences does not incur this cost. However, we also  
203 consider double readthrough events, where the backup stop codon is also skipped. This  $\rho^2$  term  
204 could also be interpreted in other ways, involving any other weak or unlikely event that causes

205 even benign cryptic sequences to incur some (smaller) cost. The primary purpose of the double  
206 readthrough cost term is to set a bound such that even when all cryptic sequences produced by  
207 single readthrough are benign, there is no danger that values of  $\rho > 0.5$  will evolve,  
208 inadvertently switching the identities of “normal” expression with “erroneous” expression. We  
209 assume the second cryptic sequences are at neutral mutational equilibrium, with probability of  
210 being deleterious equal to  $P_{del}/(P_{del}+P_{ben})$ , where  $P_{del}$  is the rate of deleterious-to-benign  
211 mutations to cryptic sequences and  $P_{ben}$  the rate of the reverse mutations. Combining the  
212 fitness costs of single and double readthrough, the fitness component representing the cost of  
213 aberrant expression is given by

214

$$215 \quad w_{misfolding} = \max(0, 1 - c\rho D - c\rho^2(1 - D) \frac{P_{del}}{P_{del}+P_{ben}}) \quad (3)$$

216

217 The equation for  $w_{misfolding}$  is the primary modification that we make to the additive model of  
218 Rajon and Masel (2011), allowing us to study variation in the degree of importance of cryptic  
219 loci, subsuming a model similar to the previous one as a special case of zero variation. Where  
220 previous work referred to the number  $L_{del}$  of loci having the deleterious rather than benign  
221 form, we now distinguish between two measures,  $L_{del}$  and  $D$ .

222

223 To study evolvability, let a subset of  $K$  (typically 50) out of the  $L$  (typically 600 or more) loci  
224 affect a quantitative trait  $x$ , selection on which creates a third fitness component. Error-free  
225 expression of locus  $k$ , occurring with frequency  $1-\rho$ , has quantitative effect  $\alpha_k$ , while expression  
226 that involves a benign version of the cryptic sequence has quantitative effect  $\alpha_k + \beta_k$ .

227 Expression that involves a deleterious version of the cryptic sequence is assumed to result in a  
228 misfolded protein that has no effect on the quantitative trait. We assume that expression level  
229  $E_k$  is constant and already factored into values of  $\alpha_k$  and  $\beta_k$ . This gives

230

$$231 \quad x = \sum_k^K ((1 - \rho)\alpha_k + \rho B_k(\alpha_k + \beta_k)) \quad (4)$$

232

233 where  $B = 1$  indicates a benign cryptic sequence and  $B = 0$  a deleterious one. Following Rajon  
234 and Masel (2011), we impose Gaussian selection on  $x$  relative to an optimal value  $x_{opt}$

235

$$236 \quad w_{trait}(x) = e^{\frac{-(x-x_{opt})^2}{2\sigma_f^2}} \quad (5)$$

237

238 where  $\sigma_f = 0.5$ .

239

240 Putting the three fitness components together, the relative fitness of a genotype is given by the  
241 product

242

$$243 \quad w = w_{proofread\_cost} \times w_{misfolding} \times w_{trait}. \quad (6)$$

244

### 245 **Variance in expression levels**

246 We estimated the variance in expression  $\sigma_E$  from PaxDB (Wang *et al.* 2012; Wang *et al.* 2015),  
247 which is based on data released by the Global Proteome Machines (GMP) and other sources.

248 We inferred  $\sigma_E$  equal to 2.24 (based on GMP 2012 release) or 3.31 (GMP 2014 release), for *S.*

249 *cerevisiae*, and 2.93 (GMP 2014 release) for *S. pombe*. Note that while our quantitative  
250 estimate of  $\sigma_E$  comes from variation in the expression levels of different proteins, consideration  
251 of variation along other lines might make a standard deviation of 2.25 into a conservative  
252 underestimate of the extent of variation. See Fig. S2 for an exploration of this parameter value.

253

## 254 **Mutation**

255 There are six kinds of mutation: 1) conversion of a deleterious cryptic sequence to a benign  
256 form, 2) conversion from benign to deleterious, 3) change to the error rate  $\rho$ , 4) change in the  $\alpha$   
257 value of one of the  $K$  quantitative trait genes, 5) change in the  $\beta$  value of one of those  $K$  genes,  
258 and 6) the co-option of a cryptic sequence to become constitutive, replacing the value of  
259 replacing  $\alpha_k$  with that of  $\alpha_k + \beta_k$  and re-initializing  $B_k$  and  $\beta_k$ .

260

261 It is this sixth kind of mutation that is responsible for the evolvability advantage of the local  
262 solution of benign cryptic sequences, providing more mutational raw material by which  $x$  might  
263 approach  $x_{opt}$  (Rajon and Masel 2011; Rajon and Masel 2013). The mutational co-option of a  
264 deleterious sequence ( $B = 0$ ) is too strongly deleterious to be favored, even when replacing  $\alpha_k$   
265 and  $\beta_k$  might be advantageous. Only benign cryptic sequences are available for mutational co-  
266 option. We use the term co-option of a 3'UTR readthrough sequence to refer to the case when  
267 a stop codon is lost by mutation, and not just read through by the ribosome (Giacomelli *et al.*  
268 2007; Vakhrusheva *et al.* 2011; Andreatta *et al.* 2015). Mutational co-option for mimicking the  
269 consequences of errors other than stop codon readthrough might involve mutations that

270 change expression timing to make a rare protein-protein interaction common, or switch a  
271 protein's affinity preference between two alternative partners.

272  
273 Because we use an origin-fixation approach to simulate evolution (see below), only relative and  
274 not absolute mutation rates matter for our outcomes, with the absolute rates setting only the  
275 timescale. We use the same mutations rates as Rajon and Masel (2011), reduced ten-fold for  
276 convenience. Each locus with a benign cryptic sequence mutates to deleterious with probability  
277  $P_{del} = 2.4 \times 10^{-8}$  per generation, while deleterious loci mutate to benign less often, with  
278 probability  $P_{ben} = 6 \times 10^{-9}$ . The error rate  $\rho$  changes with probability  $10^{-6}$  per generation, while the  
279  $\alpha$  and  $\beta$  values of each quantitative locus each change with probabilities  $3 \times 10^{-7}$  and  $3 \times 10^{-8}$ ,  
280 respectively. Mutational co-option occurs with probability  $2.56 \times 10^{-9}$  per quantitative trait locus  
281 per generation.

282  
283 Each mutation to  $\rho$  increases  $\log_{10}\rho$  by an amount sampled from  $\text{Normal}(\rho_{bias}, 0.2^2)$ . By default,  
284 we set  $\rho_{bias} = 0$ . To study extremely small populations with drift barriers to evolving even a  
285 global solution, we set  $\rho_{bias} = 0.256$  and  $0.465$ , corresponding to ratios of  $\rho$ -increasing  
286 mutations:  $\rho$ -decreasing mutations of 9:1 and 99:1, respectively.

287  
288 A similar scheme for  $\alpha$  and  $\beta$  might create, in the global solution case of relaxed selection, a  
289 probability distribution of  $\beta$  whose variance increases in an unbounded manner over time  
290 (Lande 1975; Lynch and Gabriel 1983). Following previous work (Rajon and Masel 2011; Rajon  
291 and Masel 2013), we therefore let mutations alter  $\alpha$  and  $\beta$  by an increment drawn from a

292 normal distribution with mean  $-\alpha/a$  or  $-\beta/a$ , with  $a$  set to 750, and with standard deviation of  
293  $\sigma_m/K$  in both cases, with  $\sigma_m$  set to 0.5. In the case of neutrality, this mutational process  
294 eventually reaches a stationary distribution with mean 0 and standard deviation as calculated in  
295 Eq. S3 of Rajon and Masel (2011):

$$297 \quad V(a, K, \sigma_m) = \frac{(\sigma_m/K)^2}{1 - ((a-1)/a)^2} \quad (7)$$

298  
299 A co-option at gene  $k$  changes the gene's quantitative effect to

$$301 \quad (1 - \rho)(\alpha_k + \beta_k) + \rho B'_k(\alpha_k + \beta_k + \beta'_k) \quad (8)$$

302  
303 where  $B'_k$  and  $\beta'_k$  are the state and the quantitative effect of a new cryptic sequence created by  
304 co-option. Following a co-option mutation at locus  $k$ , we set the new  $B_k$  equal to 1 or 0 with  
305 probabilities proportional to  $P_{ben}$  and  $P_{del}$ , and resample the value of  $\beta_k$  from  $\text{Normal}(0, V(a, K,$   
306  $\sigma_m))$ .

### 308 **Evolutionary simulations by origin-fixation**

309 We model evolution using an approach known as “strong-selection-weak-mutation” (Gillespie  
310 1983), or “origin-fixation” (McCandlish and Stoltzfus 2014). This approximation of population  
311 genetics is accurate in the limit where the waiting time until the appearance of the next  
312 mutation destined to fix is substantially longer than its subsequent fixation time. The  
313 population can then be approximated as genetically homogeneous in any moment in time.



314 While unrealistic for higher mutation rates and larger population sizes, origin-fixation models  
315 are computationally convenient. Still more importantly, origin-fixation models, unlike more  
316 realistic models with segregating variation, allow the location of the drift barrier to be set  
317 externally in the form of the value of the parameter  $N$ , rather than having the location of the  
318 drift barrier emerge from complicated linkage phenomena within the model. Fortunately, for  
319 quantitative traits affected by multiple cryptic loci, most evolvability arises from diversity of the  
320 effects of co-option of different loci, rather than among the diversity of the effects of co-option  
321 from different starting genotypes (Rajon and Masel 2013). This allows us to study evolvability  
322 (in the population sense of Wagner (2008)) even in the absence of genetic diversity that is  
323 imposed by the origin-fixation formulation.

324

325 Origin-fixation models are often implemented via a crude rejection algorithm; large numbers of  
326 mutations are simulated, and each is accepted as a successful fixation event if and only if a  
327 random number sample from the uniform  $[0, 1]$  distribution falls below its (fairly low) fixation  
328 probability. For large  $N$ , this method is computationally slow when significant numbers of  
329 nearly neutral mutations must be sampled before one fixes with probability  $\sim 1/N$ . Given that  
330 our model posits only a relatively small range of possible mutations, we instead sampled only  
331 mutations that go on to become fixed, by sampling according to the relative values of “fixation  
332 flux”, proportional to mutation rate  $\times$  fixation probability for each of our six categories of  
333 mutation. In other words, we used a form of the Gillespie (1977) algorithm.

334

335 In a haploid population of size  $N$ , the probability of fixation of a new mutant into a resident  
336 population is given by

337

$$338 \quad p_{fix} = \frac{1 - e^{-s}}{1 - e^{-Ns}} \quad (9)$$

339

340 where  $s = w_{mutant} / w_{resident} - 1$ . It is then straightforward to calculate fixation flux values for all  
341 possible switches between benign and deleterious states. Matters are slightly more  
342 complicated for quantitative mutations to  $\rho$ ,  $\alpha$ , and  $\beta$ , because we must integrate the fixation  
343 flux over all possible sizes for a mutation, prior to summing the fixation flux per mutation to  
344 arrive at the fixation flux for an entire mutational category.

345

346 We use the quadrature method to calculate the integral over these possibilities, using a grid of  
347 2000, limited for  $\Delta\alpha_k$  to the interval  $[-\alpha_k/a - 5\sigma_m/K, -\alpha_k/a + 5\sigma_m/K]$ , for  $\Delta\beta_k$  to the interval  $[-\beta_k/a -$   
348  $5\sigma_m/K, -\beta_k/a + 5\sigma_m/K]$ , and for  $\Delta\log_{10}\rho$ , to the interval  $[-2, \min(2, -\log_{10}\rho)]$ . In the latter case, the  
349 number of grid intervals is reduced proportional to any truncation of the interval at  $-\log_{10}\rho$ .

350

351 For mutational co-options of benign cryptic sequences, the effect of replacing the value of  $\alpha_k$   
352 with that of  $\alpha_k + \beta_k$  is fixed, but there is also a stochastic range of effects of initializing a new  $\beta_k$   
353 and a new  $B_k$ . We integrate  $\text{Prob}(\text{new } \beta_k) \times \text{Prob}(\text{fixation} | \beta_k)$  over new values of  $\beta_k$  in the range  
354  $[-5\sigma_m/K, 5\sigma_m/K]$ , and multiply by the probability that the new  $B=1$ . To this we add  $\text{Prob}(B=0) \times$   
355  $\text{Prob}(\text{fixation} | B=0)$ , a case which does not require an integration step.

356

357 The expected waiting time before the current genotype is replaced by another is

358

$$359 \text{ waiting time} = \frac{1}{\text{total fixation flux over all six categories}} \quad (10)$$

360

361 A standard Gillespie (1977) algorithm would calculate the realized waiting time as the inverse of  
362 a random number drawn from an exponential distribution with this mean. Since we are only  
363 interested in the outcome of evolution, and not the variation in its timecourse, we used the  
364 expected waiting time instead, decreasing our computation time. The waiting time can be  
365 interpreted as the time it takes for a mutation destined for fixation to appear, neglecting the  
366 time taken during the process of fixation itself. Using this interpretation, we specify waiting  
367 times in terms of numbers of generations, based on our assumptions about absolute mutation  
368 rates.

369

370 We assign the identity of the next fixation event among the six categories according to  
371 probabilities proportional to their relative fixation fluxes, then we assign the identity within the  
372 category. For switches between benign and deleterious states, allocating a fixation event within  
373 a category according to the relative values of fixation fluxes is straightforward. For mutations to  
374  $\rho$ ,  $\alpha$ , and  $\beta$ , and mutational co-option, we relax the granularity and cutoff assumptions of the  
375 grid-integration method when choosing a mutation within the category. Instead, we sample a  
376 mutational value of  $\Delta \log_{10} \rho$  from  $\text{Normal}(\rho_{bias}, 0.2^2)$ . We reject and resample  $\Delta \log_{10} \rho$  if  
377  $\Delta \log_{10} \rho \geq -\log_{10} \rho$ . Otherwise, we accept vs. reject-resample according to the fixation  
378 probability of that exact mutation, by comparing this probability to a random number uniformly

379 distributed at  $[0, 1.1 \times \text{the maximum fixation probability across the grid points previously}$   
380  $\text{calculated for } \Delta \log_{10} \rho \text{ during our grid calculation}]$ . For  $\Delta \alpha$  (or  $\Delta \beta$ ), the procedure is conceptually  
381 similar but has a more complicated implementation. We first sample from  $\text{Normal}(0, (\sigma_m / K)^2)$ .  
382 We then add the random number to each of the values of  $-\alpha_k / a$ , and calculate the sum of  
383 corresponding fixation probabilities across all loci  $k$ . We accept vs. reject-resample the  
384 mutation by comparing this sum to a random sample from a uniform distribution at  $[0, 1.1 \times \text{the}$   
385  $\text{maximum corresponding fixation probability sum calculated during our grid calculation}]$ . If the  
386 mutation is accepted, we allocate it to a locus  $k$  with probability proportional to their relative  
387 fixation probabilities. For mutational co-option of a benign cryptic sequence, the main effect is  
388 to replace  $\alpha_k$  with  $\alpha_k + \beta_k$ , but there are also more subtle effects arising from the reinitialization  
389 of the new cryptic sequence. Any of the  $k$  loci for which  $B = 1$  are eligible for co-option, the new  
390 value of  $B$  may be either 0 to 1, and the new  $\beta_k$  may take a range of values. Each combination of  
391  $k$  and new  $B$  has its own fitness flux, and the first choice is among these  $\{k, B\}$  pairs. Next we  
392 sample  $\beta_k$  from  $\text{Normal}(0, (\sigma_m / K)^2)$ ; for a new  $B$  equal to 0 we always accept the result, and for  
393 new  $B$  equal to 1, we accept vs. reject-resample  $\beta_k$  by comparing its probability of fixation to a  
394 random sample from a uniform distribution at  $[0, 1.1 \times \text{the maximum corresponding fixation}$   
395  $\text{probability sum calculated during our grid calculation}]$ .

396

### 397 **Initialization and convergence**

398 We initialized the trait optimum at  $x_{opt} = 0$ . We could have initialized all values of  $\alpha_k$  and  $\beta_k$  at  
399 zero. However, at steady state, variation in  $\sum^K \alpha_k$  and  $\sum^K \beta_k$  is far lower than would be  
400 expected from variation in  $\alpha_k$  and  $\beta_k$  – this emerges through a process of compensatory

401 evolution (Rajon and Masel 2013). Allowing a realistic steady state to emerge in this way is  
402 computationally slow under origin-fixation dynamics, especially when  $N$  is large. We instead  
403 sampled the initial values of  $\alpha_k$  and  $\beta_k$  from  $\text{Normal}(0, V(\alpha, K, \sigma_m))$ , where  $V(\alpha, K, \sigma_m)$  is defined  
404 by Eq. 7, and then subtracted  $\bar{\alpha}$  from  $\alpha_k$  and  $\bar{\beta}$  from  $\beta_k$ , where  $\bar{\alpha}$  and  $\bar{\beta}$  are the means of a  
405 genotype across each of its quantitative loci  $k$ . This process initializes  $\alpha_k$  and  $\beta_k$  to have  
406 variances equal to those of the stationary distributions, while the overall trait value is initialized  
407 at the optimal value, zero. This procedure greatly reduces the computation time needed to  
408 burn-in to achieve a somewhat subtle state of negative within-genotype among-loci  
409 correlations. We confirmed that subsequent convergence of the variance of  $\sum^K \alpha_k$  was fast,  
410 occurring in less than 1000 steps, where a “step” is defined to be the fixation of one mutation.  
411 We expect  $\log_{10}\rho$ ,  $D$ , and variation in  $\beta_k$  to converge even faster than variation in  $\alpha_k$ .

412  
413 For the low- $\rho$  initial conditions,  $\rho$  was initialized at  $10^{-5}$ , and we initialized the benign vs.  
414 deleterious status of cryptic sequences at the neutral mutational equilibrium, choosing exactly  
415  $L \times P_{del} / (P_{del} + P_{ben})$  (rounded to the nearest integer) to be deleterious, independently of their  
416 different values of  $E$ . For the high- $\rho$  initial conditions, we set  $\rho$  to  $10^{-1}$ , and made all cryptic  
417 sequences benign.

418  
419 We ran simulations for  $10^5$  steps, recording information at fixed times (measured in terms of  
420 waiting times), corresponding to approximately every 1000 steps on average, and hence  
421 yielding about 100 timepoints. To summarize the evolutionary outcome, we calculated the

422 arithmetic means of  $\log_{10}\rho$ , of  $L_{del}$ , and of  $D$  among the last 20 timepoints, i.e. approximating  
423 steps  $0.8 \times 10^5 - 1 \times 10^5$ .

424

#### 425 **Evolvability**

426 After adaptation to a trait optimum of  $x_{opt} = 0$  had run to convergence (i.e. after  $10^5$  steps), we  
427 changed  $x_{opt}$  to 2, forcing the quantitative trait to evolve rapidly. This allows the co-option of  
428 benign cryptic sequences an opportunity to increase evolvability. We measured evolvability in  
429 two ways: as the inverse of the waiting time before trait  $x$  exceeded 1, and the inverse of the  
430 waiting time before the population recovered half of the fitness it lost after  $x_{opt}$  changed.

431

432 We want our measures of evolvability to reflect a genotype's potential to generate beneficial  
433 mutations, but this goal was complicated by population size. A large population finds a given  
434 mutation faster than a small population does, inflating the total fixation flux in direct  
435 proportion to population size. We therefore divided our evolvability measures by the  
436 population size to correct for this obvious effect. This normalization converts the population-  
437 level evolvability measure into a measure of the population-size-independent evolvability of an  
438 individual that has the genotype of interest.

439

#### 440 **Transcriptional errors rates as a function of gene expression**

441 We used *E. coli* transcriptional error data from Traverse and Ochman (2016), using the authors'  
442 mapping to the *E. coli* genome and filtering to exclude low quality reads. We also excluded  
443 reads of structural RNA genes, *ompF*, *ompC*, *tufA*, and *tufB*. We pooled data acquired under

444 different media, growth phase, and replicates, and fit the pooled data to models with a  
445 different error rate,  $\rho_i$ , for each of the 12 different mistranscription types (i.e. U->T, A->G etc.).  
446 Using the glm function in R, we fit the null model

$$447$$
$$448 N_{site\_specific\_error} = \sum_i^{12} \rho_i N_{site\_specific\_reads} + \varepsilon \quad (11)$$
$$449$$

450 where  $N_{site\_specific\_error}$  is the number of reads of non-consensus nucleic acids at a specific site of a  
451 transcript and  $N_{site\_specific\_reads}$  is the total number of reads of that site. There is no intercept in  
452 the model and  $\varepsilon$  is Poisson-distributed. To detect whether transcript levels affect error rates,  
453 we compared this to the model

$$454$$
$$455 N_{site\_specific\_error} = \sum_i^{12} \rho_i N_{site\_specific\_reads} + C\sqrt{N_{site\_specific\_reads}} + \varepsilon \quad (12)$$
$$456$$

457 where  $C$  is a factor acting uniformly on each mistranscription type. The square root of  
458  $N_{site\_specific\_reads}$  gave a better fit than other functional forms that we tried. The best fit to Eq. 12  
459 had  $C = 1.2 \times 10^{-5}$ , with the arithmetic mean of the 12 fitted  $\rho_i$  values being  $2.4 \times 10^{-5}$ . The two  
460 models are nested, and so were compared using a likelihood ratio test.

461

## 462 RESULTS

463 Recall that in the absence of variation in expression among genes, there are two solutions to  
464 handle erroneous expression due to stop codon readthrough: at high population size  $N$ , the  
465 local solution purges all deleterious cryptic sequences, making high rates of readthrough

466 harmless, while at low  $N$ , the global solution reduces the rate of readthrough, allowing  
467 deleterious cryptic sequences to accumulate near-neutrally. At intermediate  $N$ , we see  
468 bistability, with either solution possible, depending on starting conditions (Fig. 1,  $\sigma_E = 0$ ). It is  
469 important to note that we use the word “bistability” loosely. Strictly speaking, bistability means  
470 that the system has two stable steady states (here a state is defined by readthrough rate and  
471 the exact property of each cryptic sequence), i.e. two attractors. But in a stochastic model,  
472 there are no attractors in the strict sense of the word, only a stationary distribution of states.  
473 We use the term bistability to refer to the case where the stationary distributions of states has  
474 two modes. Transitions between the two modes are rare, therefore the two modes can be  
475 loosely interpreted as the two attractors of the system.

476  
477 Our results qualitatively reproduce the bistability reported by Rajon and Masel (2011) for the  
478 case where there is no expression variation among genes, though the range of values of  $N$   
479 leading to bistability is smaller than that found in Rajon and Masel (2011) in which a full Wright-  
480 Fisher simulation is used. The smaller range of bistability in our model could be caused by the  
481 ease with which long-term evolution is captured using an origin-fixation framework, or by other  
482 subtle differences between the approaches, e.g. the greater ease of compensatory evolution  
483 under Wright-Fisher dynamics than under origin-fixation. We chose origin-fixation mainly to  
484 reduce the computational burden, which for our study was increased by the need to track  
485 individual loci, in contrast to previous work that needed only to track the number of loci with  
486 deleterious cryptic sequence, without distinguishing their identities (Rajon and Masel 2011;  
487 Rajon and Masel 2013).



488  
489 However, bistability vanishes with variation in expression among genes (Fig. 1,  $\sigma_E = 2.25$  and  $\sigma_E$   
490  $= 3.5$ ). To understand why, consider a population initialized at low readthrough rate ( $\rho$ ) and  
491 many deleterious cryptic sequences. Because the strength of selection against a deleterious  
492 cryptic sequence at locus  $i$  is proportional to  $\rho E_i$  (the effect of a locus  $i$  on  $D$  in Eq. 3 is  
493 proportional to  $E_i$ ), purging works at the most highly expressed loci, even when  $\rho$  is low. This  
494 lowers the proportion  $D$  of readthrough events that are deleterious, which relaxes selection for  
495 high fidelity, leading to an increase in  $\rho$ . As  $\rho$  increases, loci with lower  $E_i$  become subject to  
496 effective purging, which further reduces  $D$ , which feeds back to increase  $\rho$  further. Because  $E_i$  is  
497 log-normally distributed, but contributes linearly to selection via  $D$ , each round of the feedback  
498 loop involves smaller changes than the last. Eventually, the changes are too small for selection  
499 on them to overcome mutation bias in favor of deleterious sequences. Similarly, when a  
500 population is initialized at high  $\rho$ , mutational degradation begins at low  $E_i$  sites and arrests  
501 when selection is strong enough to kick in. The point of balance between mutation bias and  
502 selection defines a single intermediate attractor for  $\sigma_E \geq 2.25$ , instead of the bistable pair of  
503 attractors found for uniform  $E_i$  ( $\sigma_E = 0$ ). For  $\sigma_E < 2.25$ , bistability is still found, but for a narrower  
504 range of population sizes than in the absence of variation (Fig. S2).

505  
506 Even though bistability is not found for  $\sigma_E = 2.25$ , there is still a fairly sharp dichotomy, with  
507 solutions being either local (high  $\rho$  and low  $L_{del}$ ) or global (low  $\rho$  and high  $L_{del}$ ), and intermediate  
508 solutions found only for a very restrictive range of  $N$ , following a sigmoidal curve (Fig. 1a and  
509 1c). Increasing variation in expression among genes blurs the boundary between the local

510 solution and the global solution. Intermediate solutions are found for broader ranges of  $N$  as  
511 expression variance  $\sigma_E$  increases to 3.5. The trend, as expression variance  $\sigma_E$  increases from 0, is  
512 to first replace bistability with a limited range of intermediate solutions ( $\sigma_E = 2.25$ ), and then for  
513 the intermediate solutions to become more prevalent, with extreme local and global solutions  
514 becoming less attainable as  $\sigma_E > 2.25$ .

515  
516 The breakdown of the local solution begins with intermediate values of  $L_{del}$ , while the  
517 breakdown of the global solution begins with intermediate values of  $\rho$  and  $D$  (Fig. 1 a-c). The  
518 breakdown of global solutions involves high-expression loci (Fig. 2), which affect  $D$  more than  
519  $L_{del}$ . In contrast, the breakdown of local solutions involves low-expression loci (Fig. 2), which  
520 affect  $L_{del}$  more than  $D$ . Because  $\rho$  is better described as co-evolving with  $D$  than with  $L_{del}$ , as  
521 explained earlier, intermediate values of  $\rho$  are seen more in the breakdown of global than local  
522 solutions.

523  
524 The local solution promotes evolvability by making benign cryptic sequences available for co-  
525 option. Differences in evolvability between genotypes should therefore be largely determined  
526 by the fraction of quantitative trait loci that carry benign rather than deleterious cryptic  
527 sequences. In agreement with this, evolvability inversely mirrors  $L_{del}$ , as a function of population  
528 size, i.e., evolvability (Fig. 1d) resembles  $L_{del}$  (Fig. 1c) far more than it resembles  $\rho$  (Fig. 1a) or  $D$   
529 (Fig. 1b).

530

531 Reducing the total number of loci  $L$  tips the balance toward local solutions, because a higher  
532 average expression level across loci helps stop deleterious mutations from passing through the  
533 drift barrier even in smaller populations, but this does not qualitatively change our results (Fig.  
534 S4). The distinction between global and local solutions becomes more extreme when the  
535 mutation bias toward deleterious rather than benign cryptic sequences is increased from 4:1  
536 ratio to a 99:1 ratio, but persists even when the mutation bias is eliminated in favor of a 1:1  
537 ratio (Fig. 3). In the absence of mutation bias, there is less evolvability to be gained by the local  
538 relative to the global solution, since half the quantitative loci are available for co-option  
539 regardless (Fig. 3c). Nevertheless, a small evolvability advantage to the local solution can still be  
540 observed (Fig. 3d). In any case, assuming mutation bias toward deleterious options is  
541 biologically reasonable, and Fig. 3 shows that results are not sensitive to the strength of our  
542 assumptions on this count.

543  
544 When we also account for mutation bias that tends to increase rather than decrease the error  
545 rate  $\rho$ , our model can explain the previously puzzling observation that the rate of  
546 transcriptional errors in small- $N_e$  endosymbiont bacteria *Buchnera* is as high as that in large- $N_e$  *E.*  
547 *coli* (McCandlish and Plotkin 2016; Traverse and Ochman 2016). In extremely small populations,  
548 even the global solution is subject to a drift barrier making  $\rho$  higher than its optimal value. For  $N$   
549 so small such that most  $\rho$ -increasing mutations pass through the drift barrier,  $\rho$  can be as large  
550 as that in large populations (Fig. 4a). Despite their high error rates, these extremely small  
551 populations also carry heavy loads of deleterious cryptic products (Fig. 4b and c), consistent  
552 with the fact that in *Buchnera*, unlike *E. coli*, selection is unable to reduce the fraction of non-

553 synonymous transcriptional errors that are non-synonymous (Traverse and Ochman 2016). High  
554  $\rho$  shows the absence of a global solution, while high  $D$  and  $L_{del}$  show the absence of a local  
555 solution; neither solution is found for a sufficiently small population. Equal error rates in large  
556 and small populations can also be found, given bias in mutations to  $\rho$ , when there is no  
557 variation in expression levels (Fig. S5).

558

559

## DISCUSSION

560 When genes vary in their expression levels, the dichotomy between the local and global  
561 solutions is replaced by a continuous transition. Very large populations still resemble the local  
562 solution, although mutations making cryptic sequences deleterious may still pass through the  
563 drift barrier in the occasional low-expression gene. Very small populations still resemble the  
564 global solution, although mutations making cryptic sequences deleterious may still be  
565 effectively purged in a few high-expression genes; because their high expression  
566 disproportionately affects the burden from misexpression, this relaxes expression for high  
567 fidelity, leading to less extreme proofreading.

568

569 In agreement with drift barrier theory, large- $N_e$  *E. coli* exhibits a local solution of a tendency for  
570 transcription errors to have synonymous effects, while small- $N_e$  *Buchnera* does not (Traverse  
571 and Ochman 2016). Interestingly, while as predicted, the global solution of low transcriptional  
572 error rates does not obey the naïve drift barrier expectation of being weaker in *Buchnera* than  
573 in *E. coli* (Traverse and Ochman 2016), nor is it stronger in *Buchnera* as predicted by previous  
574 theory on the interplay between global and local solutions (Rajon and Masel 2011; McCandlish

575 and Plotkin 2016). Here we explain this by also taking into account a drift barrier on the global  
576 solution of low error rates, a drift barrier seen in the presence of mutation bias towards higher  
577 error rates. Small *Buchnera* populations have high error rates because they can't manage  
578 better; large *E. coli* populations have equally high error rates because with the consequences of  
579 error already purged, they don't need to incur the cost that proofreading entails.

580

581 With small amounts of variation in expression among genes, the range of intermediate values  
582 of  $N_e$  for which bistability is found shrinks. With more variation, bistability vanishes in favor of a  
583 sigmoidal transition between global and local solutions. With still more, the sigmoid is  
584 smoothed out, and intermediate solutions are found for most values of  $N_e$ . To interpret our  
585 results correctly, we must therefore estimate the degree to which genes vary. The results  
586 presented here focus on two estimates of the variation in log-expression in yeast, namely  
587 standard deviations of 2.25 and 3.5. However, other variation in the consequences of genes'  
588 erroneous expression, in addition to variation in expression level, might make larger standard  
589 deviations a better model of reality, further supporting a continuum of intermediate solutions.

590

591 Our model makes three critical assumptions, which must be understood for the results to be  
592 interpreted appropriately. First, a "locus" in our model consists of one regular and one cryptic  
593 sequence. The primary example that we used to parameterize the results posits an entire  
594 protein-coding gene as the regular sequence, and the extended polypeptide resulting from stop  
595 codon readthrough as the cryptic alternative. In the example of transcriptional errors, a locus is  
596 a single codon, with its corresponding amino acid being the regular sequence and the most

597 common consequence of a transcriptional error, given their distribution, as the cryptic. The  
598 case of one regular sequence and many alternative cryptic ones has not been modeled.  
599 Similarly, proteins may each have a regular fold or binding partner, and our model considers the  
600 contrast between this and a single cryptic alternative.

601

602 Second, we assume that the rate of gene expression errors is set globally, across all loci. In  
603 reality, individual context may also affect the error rate, giving error rates a local solution  
604 aspect as well. A model of three rather than two interacting solutions – global error rates, local  
605 error rates, and local robustness to the consequences of error – remains for future work.

606 Perhaps highly expressed genes will have both more benign cryptic sequences and lower rates  
607 of error, or perhaps the evolution of one kind of local solution will alleviate the need for  
608 another. Testing this empirically requires data on site-specific error rates and on a credible  
609 marker for the benign status of members of an identifiable class of cryptic sequences. Such  
610 tools are now becoming available, and indeed we recently found a positive correlation between  
611 a large number of readthrough errors at a particular stop codon and the benign status of the  
612 readthrough translation product (Kosinski et al., manuscript in preparation). We also reanalyzed  
613 the data of Traverse and Ochman (2016) to find that highly expressed transcripts have lower  
614 transcriptional error rates ( $p = 3.95 \times 10^{-21}$ , see Methods). This corresponds to an effect size in  
615 which the error rate is reduced by 33% at the most highly transcribed site, compared to a site  
616 transcribed at a 5000-fold lower level and hence detectable on average in only a single read per  
617 site.

618

619 Finally, we assume that the consequences of errors have a bimodal distribution: either highly  
620 deleterious or largely benign, but rarely in between. In other words, we assume that a basic  
621 phenomenon in biology is that changes tend to either break something, or to tinker with it.  
622 There are a variety of lines of evidence supporting this intuitively reasonable assumption  
623 (Fudala and Korona 2009; Wylie and Shakhnovich 2011).

624

625

#### ACKNOWLEDGEMENTS

626 This work was supported by the John Templeton Foundation [grant number 39667]. DJP was  
627 also funded by the Undergraduate Biology Research Program at the University of Arizona. We  
628 thank Lilach Hadany, Yoav Ram, and other members of the Hadany group for helpful  
629 discussions that prompted us to explore variation in expression. We thank Paul Nelson for  
630 developing the idea of local error rates as an expansion of our model, Ben Wilson for help with  
631 R, and Etienne Rajon for helpful comments on the manuscript. We also thank Charles Traverse  
632 and Howard Ochman for sharing their data on transcriptional errors. An allocation of computer  
633 time from the UA Research Computing High Performance Computing (HPC) and High  
634 Throughput Computing (HTC) at the University of Arizona is gratefully acknowledged.

635

#### LITERATURE CITED

- Adachi, M., and A. R. O. Cavalcanti, 2009 Tandem Stop Codons in Ciliates That Reassign Stop Codons. *J. Mol. Evol.* 68: 424-431.
- Andreatta, M. E., J. A. Levine, S. G. Foy, L. D. Guzman, L. J. Kosinski *et al.*, 2015 The Recent De Novo Origin of Protein C-Termini. *Genome Biology and Evolution* 7: 1686-1701.

- Brettner, L. M., and J. Masel, 2012 Protein stickiness, rather than number of functional protein-protein interactions, predicts expression noise and plasticity in yeast. *BMC Systems Biology* 6: 128.
- Drummond, D. A., and C. O. Wilke, 2008 Mistranslation-Induced Protein Misfolding as a Dominant Constraint on Coding-Sequence Evolution. *Cell* 134: 341-352.
- Frank, S. A., 2007 Maladaptation and the Paradox of Robustness in Evolution. *PLoS ONE* 2: e1021.
- Fudala, A., and R. Korona, 2009 Low frequency of mutations with strongly deleterious but nonlethal fitness effects. *Evolution* 63: 2164-2171.
- Geiler-Samerotte, K. A., M. F. Dion, B. A. Budnik, S. M. Wang, D. L. Hartl *et al.*, 2011 Misfolded proteins impose a dosage-dependent fitness cost and trigger a cytosolic unfolded protein response in yeast. *Proc. Natl. Acad. Sci. U.S.A.* 108: 680-685.
- Giacomelli, M. G., A. S. Hancock and J. Masel, 2007 The conversion of 3' UTRs into coding regions. *Mol. Biol. Evol.* 24: 457-464.
- Gillespie, D. T., 1977 Exact stochastic simulation of coupled chemical reactions. *J. Phys. Chem.* 81: 2340-2361.
- Gillespie, J. H., 1983 Some properties of finite populations experiencing strong selection and weak mutation. *Am. Nat.* 121: 691-708.
- Goldberg, A. L., 2003 Protein degradation and protection against misfolded or damaged proteins. *Nature* 426: 895-899.
- Good, B. H., and M. M. Desai, 2014 Deleterious Passengers in Adapting Populations. *Genetics* 198: 1183-1208.
- Haldane, J. B. S., 1957 The cost of natural selection. *J. Genetic.* 55: 511-524.
- Kourie, J. I., and C. L. Henry, 2002 Ion channel formation and membrane-linked pathologies of misfolded hydrophobic proteins: The role of dangerous unchaperoned molecules. *Clin. Exp. Pharmacol. Physiol.* 29: 741-753.



Krakauer, D. C., and J. B. Plotkin, 2002 Redundancy, antiredundancy, and the robustness of genomes.

Proc. Natl. Acad. Sci. U.S.A. 99: 1405-1409.

Lande, R., 1975 The maintenance of genetic variability by mutation in a polygenic character with linked

loci. Genet. Res. 26: 221-235.

Liang, H., A. R. O. Cavalcanti and L. F. Landweber, 2005 Conservation of tandem stop codons in yeasts.

Genome Biol. 6: R31.

Lynch, M., 2007 *The origins of genome architecture*. Sinauer Associates, Sunderland.

Lynch, M., 2010 Evolution of the mutation rate. Trends Genet. 26: 345-352.

Lynch, M., 2012 Evolutionary layering and the limits to cellular perfection. Proc. Natl. Acad. Sci. U.S.A.

109: 18851-18856.

Lynch, M., and W. Gabriel, 1983 Phenotypic evolution and parthenogenesis. Am. Nat. 122: 745-764.

McCandlish, D. M., and J. B. Plotkin, 2016 Transcriptional errors and the drift barrier. Proc. Natl. Acad.

Sci. U.S.A. 113 3136-3138

McCandlish, D. M., and A. Stoltzfus, 2014 Modeling Evolution Using the Probability of Fixation: History

and Implications. Q. Rev. Biol. 89: 225-252.

Nichols, J. L., 1970 Nucleotide Sequence from the Polypeptide Chain Termination Region of the Coat

Protein Cistron in Bacteriophage R17 RNA. Nature 225: 147-151.

Rajon, E., and J. Masel, 2011 The evolution of molecular error rates and the consequences for

evolvability. Proc. Natl. Acad. Sci. U.S.A. 108: 1082-1087.

Rajon, E., and J. Masel, 2013 Compensatory Evolution and the Origins of Innovations. Genetics 193:

1209-1220.

Thomas, P. J., B.-H. Qu and P. L. Pedersen, 1995 Defective protein folding as a basis of human disease.

Trends Biochem. Sci. 20: 456-459.

- Traverse, C. C., and H. Ochman, 2016 Conserved rates and patterns of transcription errors across bacterial growth states and lifestyles. *Proc. Natl. Acad. Sci. U.S.A.* 113: 3311-3316
- Vakhrusheva, A., M. Kazanov, A. Mironov and G. Bazykin, 2011 Evolution of Prokaryotic Genes by Shift of Stop Codons. *J. Mol. Evol.* 72: 138-146.
- Wagner, A., 2008 Robustness and evolvability: a paradox resolved. *Proc. R. Soc. Lond. Ser. B-Biol. Sci.* 275: 91-100.
- Wang, M., C. J. Herrmann, M. Simonovic, D. Szklarczyk and C. von Mering, 2015 Version 4.0 of PaxDb: Protein abundance data, integrated across model organisms, tissues, and cell-lines. *Proteomics* 15: 3163-3168.
- Wang, M., M. Weiss, M. Simonovic, G. Haertinger, S. P. Schrimpf *et al.*, 2012 PaxDb, a Database of Protein Abundance Averages Across All Three Domains of Life. *Mol. Cell. Proteomics* 11: 492-500.
- Warnecke, T., and L. D. Hurst, 2011 Error prevention and mitigation as forces in the evolution of genes and genomes. *Nat Rev Genet* 12: 875-881.
- Williams, I., J. Richardson, A. Starkey and I. Stansfield, 2004 Genome-wide prediction of stop codon readthrough during translation in the yeast *Saccharomyces cerevisiae*. *Nucleic Acids Res.* 32: 6605-6616.
- Wu, X., and L. D. Hurst, 2015 Why Selection Might Be Stronger When Populations Are Small: Intron Size and Density Predict within and between-Species Usage of Exonic Splice Associated cis-Motifs. *Mol. Biol. Evol.* 32: 1847-1861.
- Wylie, C. S., and E. I. Shakhnovich, 2011 A biophysical protein folding model accounts for most mutational fitness effects in viruses. *Proc. Natl. Acad. Sci. U.S.A.* 108: 9916-9921.

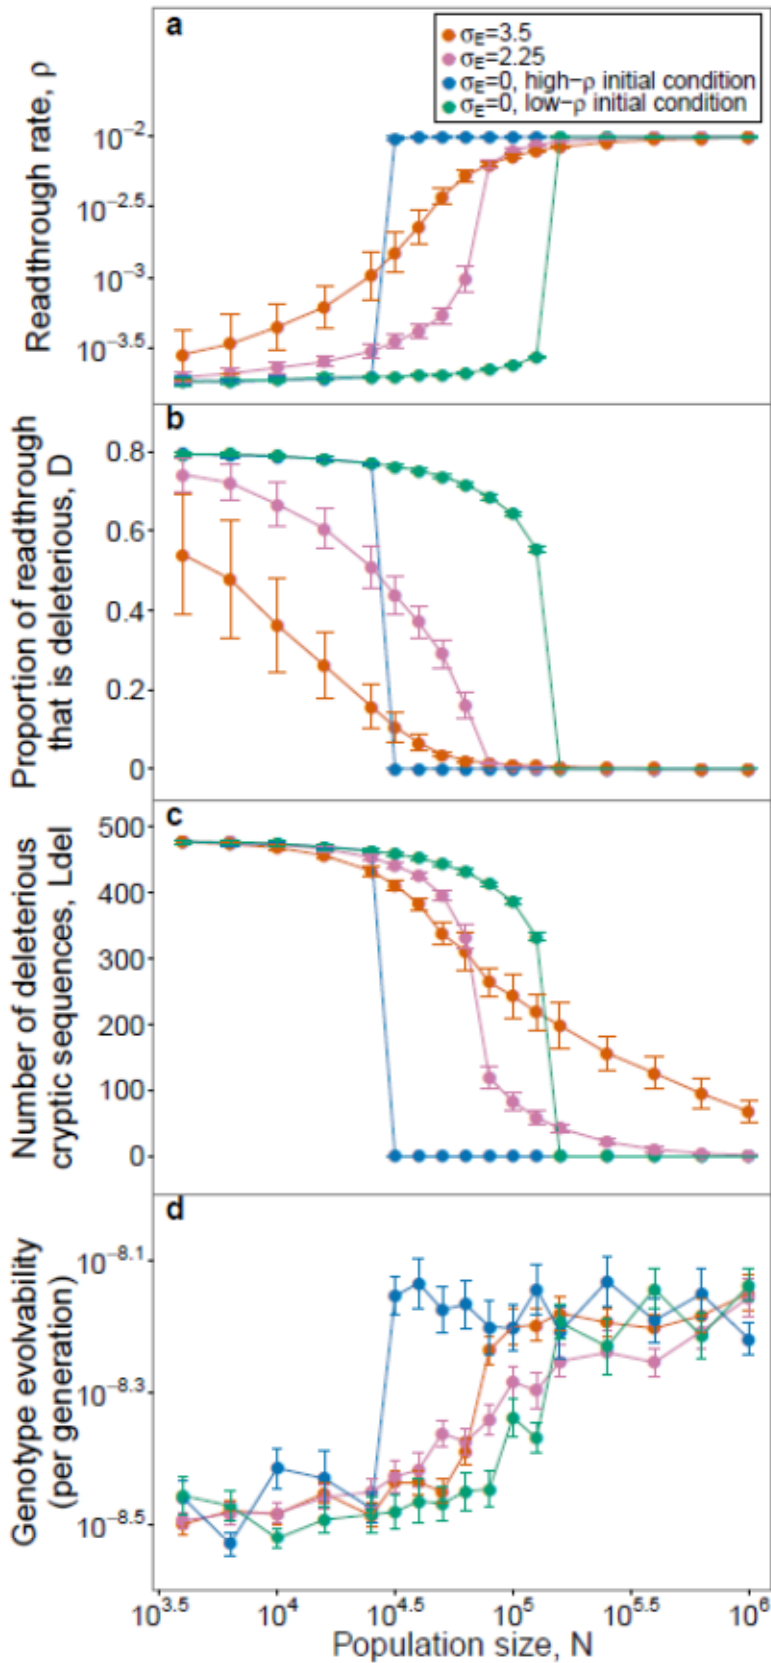

**Figure 1:** Evolutionary dynamics are bistable in the absence of variation in gene expression ( $\sigma_E = 0$ ), but not with variation in gene expression ( $\sigma_E = 2.25$  and  $\sigma_E = 3.5$ ). We calculated the average values of  $\rho$ ,  $D$ , and  $L_{del}$  towards the end of the simulations, and then measured the genotype evolvability after changing the optimal trait value (see Methods for details). For each value of  $N$ , 20 simulations were initialized at high- $\rho$  conditions and 15 at low- $\rho$  conditions. For  $\sigma_E = 2.25$  and  $\sigma_E = 3.5$ , simulations from the two initial conditions reached indistinguishable endpoints (Fig. S1), so the results were pooled. The increment in  $N$  is  $10^{0.1}$  between  $10^{4.4}$  and  $10^{5.2}$  to increase resolution, and is  $10^{0.2}$  elsewhere. At  $\sigma_E = 0$ ,  $D$  is indistinguishable from zero for  $N \geq 10^{5.2}$  under high- $\rho$  conditions and for  $N \geq 10^{4.7}$  under low- $\rho$  conditions, corresponding to  $L_{del}$  being effectively zero. In contrast, when  $\sigma_E = 2.25$  or  $3.5$ , because the weakness of selection on low-expression genes prevents  $L_{del}$  from falling all the way to zero,  $D$  never quite reaches zero either, despite appearing superimposable in **b**. For **a** to **c**, data is shown as mean  $\pm$  SD. For evolvability (**d**), data is shown as mean  $\pm$  SE. Evolvability is based on time to fitness recovery; see Fig. S3 for similar results based on time to trait recovery.  $L = 600$ .

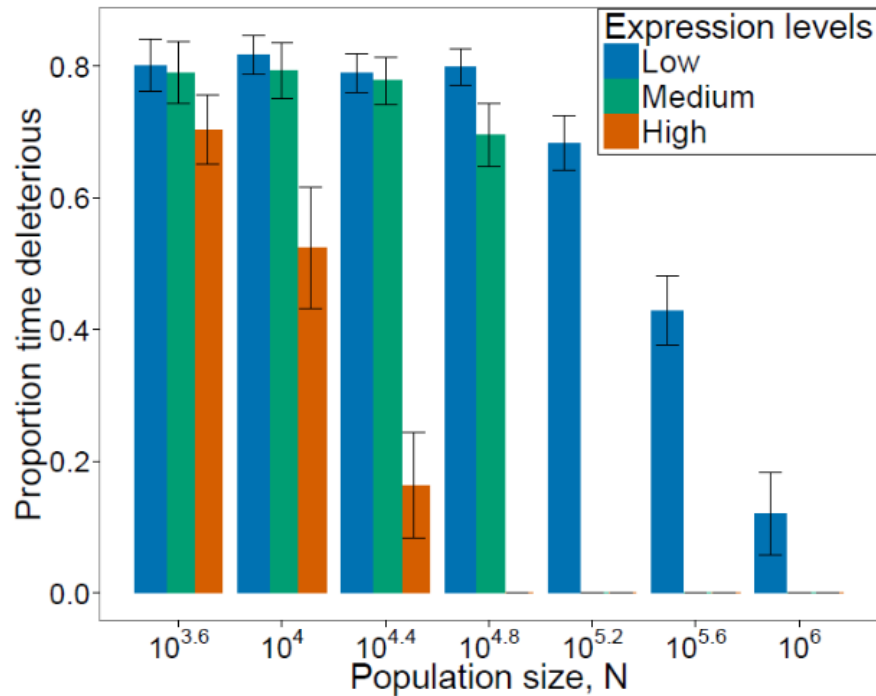

**Figure 2:** The effectiveness of purging a deleterious cryptic sequences of deleterious mutations depends on its expression level. We examined the states of the cryptic sequences of the loci with the 10 highest, the 10 lowest, and the 10 median expression levels among the 600 loci in each of the simulations showed in Fig. 1 ( $\sigma_E = 2.25$ ). We counted how often each locus contained a deleterious cryptic sequence among the last 20 timepoints we had collected from that simulation. Bars represent the proportion of time that each of the 10 loci carried a deleterious cryptic sequences, averaged over 20 replicates, and shown as mean  $\pm$  SD. Simulations were initialized at low- $\rho$  conditions.

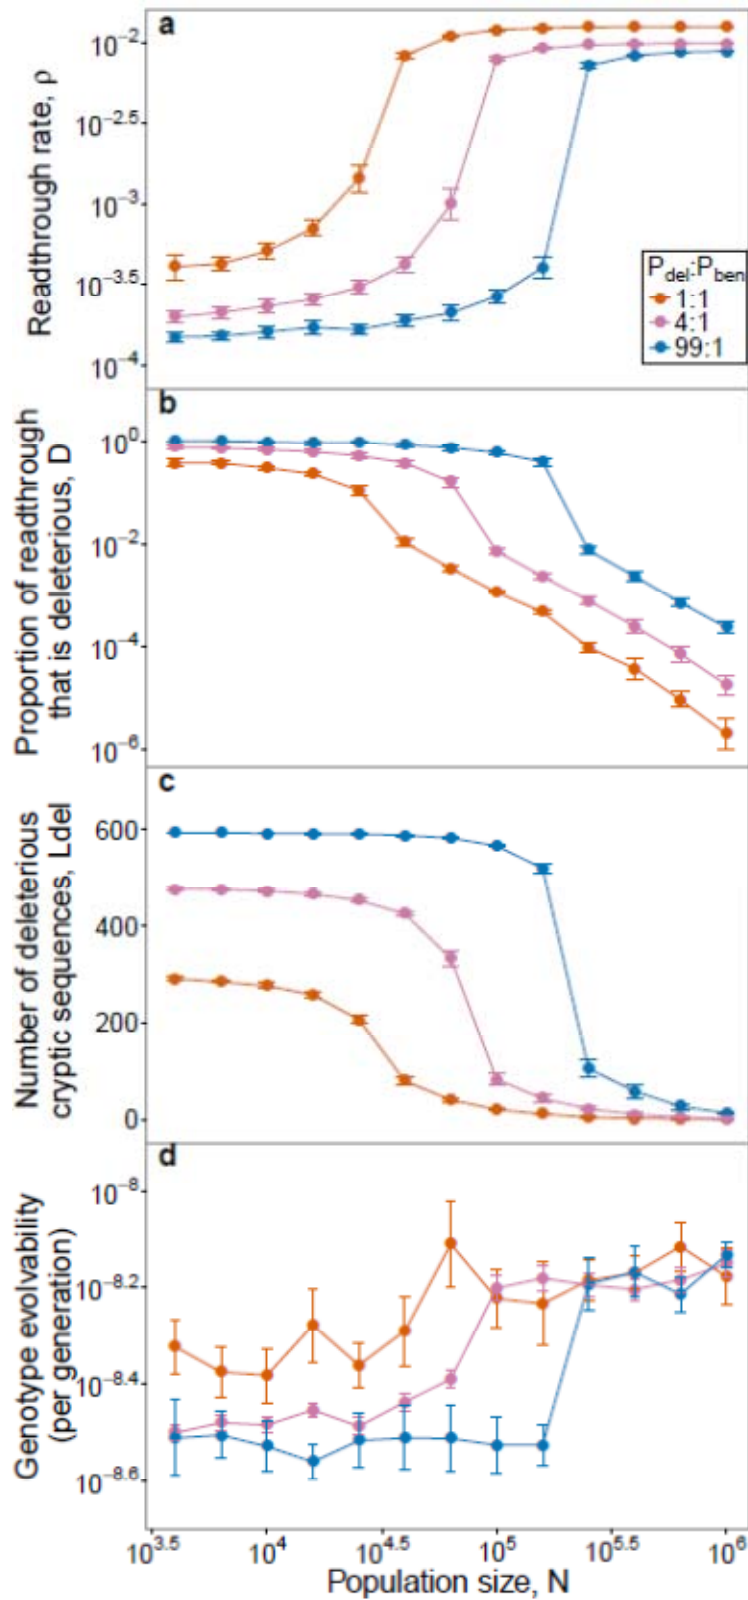

as  $\text{mean} \pm \text{SE}$ .  $L = 600$  and  $\sigma_E = 2.25$ .

**Figure 3:** Results become more extreme when the mutation bias in the state of a cryptic sequence is increased from 4:1 ratio to a 99:1 ratio, but do not disappear completely when the mutation bias is eliminated in favor of a 1:1 ratio. The location of the drift barrier shifts as a function of mutation bias, but the dichotomy between local and global solutions (as seen in values of  $\rho$  and  $D$ ) is not sensitive to relaxing the mutation bias. The advantage of the local solution with respect to evolvability (as seen in **d** and mirrored in  $L_{del}$  (**c**)) is more sensitive to lack of mutation bias, but is still visible even with a 1:1 ratio. To compare results across different mutation biases, we kept the sum of the two mutation rates constant. For the low- $\rho$  initial conditions, the number of deleterious cryptic sequences was initialized at the neutral mutational equilibrium of  $L \times P_{del}/(P_{del}+P_{ben})$  (rounded to the nearest integer). For  $P_{del}:P_{ben} = 4:1$ , we reused the results shown in Fig. 1. For the other ratios, five replicates were run for each initial condition, and pooled. For panels **a** to **c**, data is shown as  $\text{mean} \pm \text{SD}$ . For panel **d**, data is based on time to fitness recovery and is shown

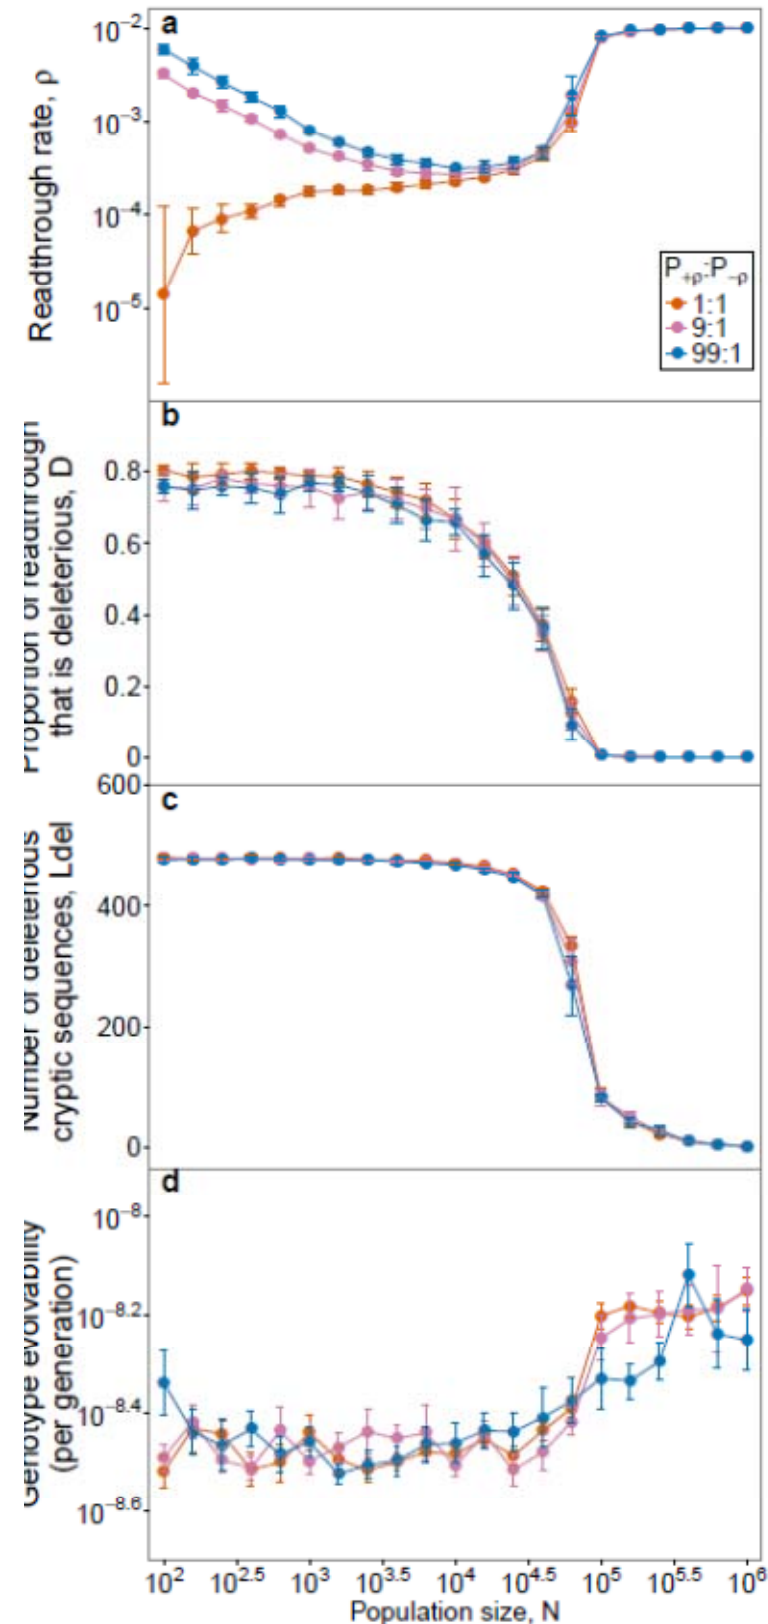

**Figure 4:** Mutation bias tends to increase  $\rho$ , such that even the global solution breaks down in sufficiently small populations.  $P_{+\rho}$  is the probability that a mutation increases  $\rho$ , and  $P_{-\rho}$  is the probability of a decrease. Each data point, (except those taken from Fig. 1 with  $P_{+\rho}:P_{-\rho} = 1:1$  and  $N = 10^{3.6}$  to  $N = 10^{6.0}$ ), is pooled from 5 replicates of high- $\rho$  initial conditions and 5 replicates of low- $\rho$  initial conditions. Because we assume multiplicative mutational effects to  $\rho$ , its value converges even for extremely small  $N$ . I.e., as  $\rho$  increases, the additive effect size  $\Delta\rho$  of a typical mutation also increases, preventing it from passing through the drift barrier. For **a**, **b**, and **c**, data is shown as mean  $\pm$  SD. For **d**, data is shown as mean  $\pm$  SE.  $L = 600$  and  $\sigma_E = 2.25$ . Note that large  $N$  evolvability goes down with extreme mutation bias: this is because reductions to  $\rho$  are sometimes beneficial when  $\sum \beta_k$  is in a favorable direction for trait evolution; such opportunities are foregone in

these populations.
